# Supplementary material
Source: MDPI journal article supplement (https://www.mdpi.com/2227-9040/12/1/6)
Supplement: s1 [file s1]

**Table S1. Mass spectral parameters of three Ginkgolic acids**

| <b>Compound name</b> | <b>Parent (<i>m/z</i>)</b> | <b>Daughter (<i>m/z</i>)</b> | <b>Cone voltage (V)</b> | <b>Collision energy (V)</b> |
|----------------------|----------------------------|------------------------------|-------------------------|-----------------------------|
| Ginkgolic acid C13:0 | 319.21                     | 275.20                       | 64                      | 20                          |
| Ginkgolic acid C15:1 | 345.20                     | 301.21                       | 26                      | 20                          |
| Ginkgolic acid C17:1 | 373.30                     | 329.30                       | 30                      | 22                          |

Table S2. Spiking recovery of UPLC-MS/MS method

| Analytes                | Original concentration<br>( $\mu\text{g/mL}$ ) | Spiked concentration<br>( $\mu\text{g/mL}$ ) | Detected concentration<br>( $\mu\text{g/mL}$ ) | Recovery rate<br>(%) | Average recovery rate<br>(%) | RSD<br>(%) |
|-------------------------|------------------------------------------------|----------------------------------------------|------------------------------------------------|----------------------|------------------------------|------------|
| Ginkgolic acid<br>C13:0 | 0.5625                                         | 0.5625                                       | 1.1607                                         | 106.34               | 103.92                       | 1.74       |
|                         |                                                |                                              | 1.1444                                         | 103.44               |                              |            |
|                         |                                                |                                              | 1.1362                                         | 101.98               |                              |            |
|                         |                                                | 1.6875                                       | 2.2708                                         | 101.23               | 102.21                       | 0.69       |
|                         |                                                |                                              | 2.2926                                         | 102.52               |                              |            |
|                         |                                                |                                              | 2.2986                                         | 102.88               |                              |            |
|                         |                                                | 3.9375                                       | 4.4776                                         | 99.43                | 96.62                        | 2.39       |
|                         |                                                |                                              | 4.2547                                         | 93.77                |                              |            |
|                         |                                                |                                              | 4.3689                                         | 96.67                |                              |            |
| Ginkgolic acid<br>C15:1 | 0.35                                           | 0.35                                         | 0.7176                                         | 105.03               | 102.97                       | 2.86       |
|                         |                                                |                                              | 0.7178                                         | 105.07               |                              |            |
|                         |                                                |                                              | 0.6958                                         | 98.80                |                              |            |
|                         |                                                | 1.05                                         | 1.3641                                         | 96.58                | 98.09                        | 1.38       |
|                         |                                                |                                              | 1.3987                                         | 99.87                |                              |            |
|                         |                                                |                                              | 1.3772                                         | 97.83                |                              |            |
|                         |                                                | 2.45                                         | 2.8130                                         | 100.53               | 96.33                        | 3.18       |
|                         |                                                |                                              | 2.6457                                         | 93.30                |                              |            |
|                         |                                                |                                              | 2.6813                                         | 95.15                |                              |            |
| Ginkgolic acid<br>C17:1 | 0.3375                                         | 0.3375                                       | 0.6880                                         | 103.84               | 104.89                       | 0.72       |
|                         |                                                |                                              | 0.6928                                         | 105.26               |                              |            |
|                         |                                                |                                              | 0.6938                                         | 105.57               |                              |            |
|                         |                                                | 1.0125                                       | 1.3648                                         | 101.46               | 101.05                       | 3.89       |
|                         |                                                |                                              | 1.3100                                         | 96.05                |                              |            |
|                         |                                                |                                              | 1.4072                                         | 105.65               |                              |            |
|                         |                                                | 2.3625                                       | 2.6885                                         | 99.52                | 100.91                       | 1.47       |
|                         |                                                |                                              | 2.7702                                         | 102.97               |                              |            |
|                         |                                                |                                              | 2.7054                                         | 100.23               |                              |            |
